# Supplementary material for: Urinary Proteomics for Early Diagnosis in Diabetic Nephropathy
Source: Oxford University Press journal article supplement (doi:10.2337/db12-0348), 2012-08-08
Supplement: db120348supplementarydata2.xls [file db120348supplementarydata2.xls]

## Sheet: Patients data
Supplementary table 1. Patient’s data of the longitudinal collected samples. Table includes data of 316 urine samples from 35 patients. Patients ID and evaluation ID are correlated to the sampling center and original ID. Furthermore, date of birth, gender, diabetes type, year of diabetes diagnosis, examination date, and age are listed. Scores of the CKD273-classifier, urinary albumin excretion ra…
Center	patient ID	evaluation ID	date of birth	gender [0=female, 1=male]	Diabetes type	Diabetes since	examition date	age	Progressor [1=yes; 0=no]	CKD-model score	U-albumin [µg/min]	S-creatinine [μmol/L]	eGFR [ml/min/1.73m2]	Glucose [mmol/L]	HbA1c [%]	Cholesterol [mmol/l]	HDL [mmol/l]	Triglyceride [mmol/l]	syst BP [mmHg]	dias BP [mmHg]	clinical endpoint
Steno Center	12049	44476	1957-09-16	1	1	1979-07-13	1991-01-08	33.3342	0	0.213	4.16667	73	113.841	8.7	7.5
Steno Center	12049	44495					1992-07-17	34.8575	0	-0.918	2.77778			8	7.6
Steno Center	12049	44472					1993-07-16	35.8548	0	-0.289	2.77778			6.7	7.8
Steno Center	12049	44488					1994-02-17	36.4466	0	-0.414	3.47222			19.5	7.8
Steno Center	12049	44478					1994-07-12	36.8438	0	-0.431	5.55556	90	65.0062	18.6	9.4				130	80
Steno Center	12049	44479					1996-08-06	38.9151	0	-0.334	5			6.6	9.4				120	80
Steno Center	12049	44480					1997-07-15	39.8548	0	-0.28	4.86111			15.7					145	85
Steno Center	12049	44481					1998-08-25	40.9671	0	-0.629	5			14	8.6				145	80
Steno Center	12049	44471					2000-06-09	42.7589	0	-0.141	2.08333	84	68.2977	12.8	7.3	5	1.13	0.9	149	94	Last known alive 2011
Steno Center	12050	44484	1947-08-29	1	1	1979-11-27	1991-07-03	43.874	0	-0.91	2.08333			13.2	8.4				130	80
Steno Center	12050	44483					1994-04-01	46.6219	0	-0.572	5
Steno Center	12050	44489					1995-03-07	47.5534	0	-0.703	4.16667	96	57.2946	12.2	9.6	5			135	85
Steno Center	12050	44490					1996-01-24	48.4384	0	-0.421	15.9722			14.7	10.2						Last known alive 2008
Steno Center	12051	44491	1945-03-05	0	1	1980-05-23	1990-02-08	44.9616	0	-0.353	5			19.2
Steno Center	12051	44511					1991-05-23	46.2466	0	-0.384	4.16667	64	91.9983	13.8	6.9				110	80
Steno Center	12051	44493					1992-05-19	47.2384	0	0.08	4.16667	66	88.4071	9.2	7.9
Steno Center	12051	44530					1993-05-27	48.2603	0	-0.024	4.16667	74	77.1366	11	8
Steno Center	12051	44531					1994-05-26	49.2575	0	0.194	3.47222			7.9	8.3
Steno Center	12051	44528					1995-05-29	50.2658	0	0.287	5.55556			6.5	7.9
Steno Center	12051	44539					1996-05-24	51.2548	0	0.304	5	74	76.1997	22.2	8				170	70
Steno Center	12051	44524					1998-12-17	53.8219	0	-0.474	5			20.6	7.9
Steno Center	12051	44529					2000-06-22	55.337	0	-0.283	5			18.2	9.1				128	83
Steno Center	12051	44500					2002-06-25	57.3452	0	0.292	5
Steno Center	12051	44532					2003-09-04	58.5397	0	-0.171	5				7.2
Steno Center	12051	44538					2005-03-14	60.0658	0	0.14	5	58	97.7385		7.5	5.5	2.6	1	110	60	Last known alive 2011
Steno Center	12052	44502	1953-12-11	1	1	1980-12-18	1990-06-21	36.5507	0	-0.847	7.63889	67	123.356	13.9	8.1				125	75
Steno Center	12052	44503					1993-06-15	39.537	0	-0.765	12.5	79	74.4851	12.2	9.9
Steno Center	12052	44504					1994-06-14	40.5342	0	-0.274	4.86111			8.1	9.1				139	79
Steno Center	12052	44541					1995-06-13	41.5315	0	-0.815	5.55556			8.1	9.1
Steno Center	12052	44534					1996-07-02	42.5863	0	-1.063	5			14.6	8.9
Steno Center	12052	44526					1997-06-19	43.5507	0	-1.313	5			14.9	9.4				137	87
Steno Center	12052	44506					2001-09-09	47.7781	0	-1.169	3	99	55.2429			6.3	1.8	1	141	89
Steno Center	12052	44507					2002-03-26	48.3205	0	-0.17	5	96	57.1088		7.7	6.2	1.6	1	135	90
Steno Center	12052	44615					2003-09-10	49.7808	0	-0.025	4.86111				8.9						Last known alive 2011
Steno Center	12053	44617	1954-03-17	1	1	1984-01-27	1990-08-23	36.4603	0	-0.696	4.86111			6.7	7.1				110	70
Steno Center	12053	44618					1991-08-27	37.4712	0	0.24	4.16667			6	7				130	75
Steno Center	12053	44619					1992-01-28	37.8932	0	-0.414	4.16667	77	77.3864	10.5	7.4
Steno Center	12053	44536					1993-08-11	39.4301	0	0.075	4.86111	74	80.3667	13.9	7.7	6	1.21	4.4	120	75
Steno Center	12053	44508					1994-11-13	40.6877	0	-0.309	5.55556	96	59.1372	11	9	5	1.17	3.4	120	75
Steno Center	12053	44525					1995-05-23	41.211	0	-0.674	5	82	70.7512	3.2	8.6				140	76
Steno Center	12053	44537					1996-07-09	42.3425	0	-0.048	4.16667			9	8.5
Steno Center	12053	44519					1997-09-09	43.5123	0	-1.182	5			16.7	8.1				130	80
Steno Center	12053	44620					1998-05-18	44.2	0	-0.219	2.77778	84	67.8397	10.6	8.9				143	83	Last known alive 2011
Steno Center	12054	44520	1958-09-05	1	1	1984-02-09	1990-02-06	31.4438	0	-0.864	6.25			3.7	6.5
Steno Center	12054	44521					1992-02-04	33.4384	0	-0.536	5.55556			6.8	6
Steno Center	12054	44542					1993-02-09	34.4548	0	-0.701	5.55556			13.7	6.7
Steno Center	12054	44535					1994-01-25	35.4137	0	-0.327	6.25	73	83.4385	8.1	6.9
Steno Center	12054	44533					1999-10-27	41.1699	0	-0.334	3.47222	81	71.7747	9.1	6.5	5	1.92	0.8	129	64
Steno Center	12054	44621					2000-11-28	42.2603	0	-0.483	5			6.3	6.7	5	1.89	0.7
Steno Center	12054	44622					2001-12-03	43.274	0	0.065	5.55556
Steno Center	12054	44632					2002-10-20	44.1534	0	-0.238	3.47222				6.3						Last known alive 2010
Steno Center	12055	44631	1941-12-08	0	1	1984-04-16	1998-05-01	56.4329	0	-0.415	5
Steno Center	12055	44630					1999-05-03	57.4384	0	-0.536	6.25	73	75.6363	7.3	8.4	6	1.57	1	153	88
Steno Center	12055	44629					2000-09-08	58.7918	0	-0.94	4.16667			13	7.7				140	85
Steno Center	12055	44662					2001-09-01	59.7726	0	0.252	5
Steno Center	12055	44661					2002-10-01	60.8548	0	-0.065	5
Steno Center	12055	44670					2003-10-01	61.8548	0	-0.322	5										Last known alive 2011
Steno Center	12056	44665	1950-02-01	1	1	1984-05-29	1991-05-29	41.3479	0	-0.076	8.33333	82	95.2878	10.5	7.1				125	85
Steno Center	12056	44675					1996-08-06	46.5425	0	-0.66	5.55556			12.8	6.8
Steno Center	12056	44677					2002-07-29	52.5233	0	-0.251	5	94	57.531		7.4	4.6	1.5	2	136	86
Steno Center	12056	44678					2003-08-19	53.5808	0	-0.698	5				6.9						Last known alive 2011
Steno Center	12060	44742	1947-12-04	1	1	1982-03-02	1990-09-21	42.8274	0	-0.089	4.16667	84	92.0155	13.6	8.4
Steno Center	12060	44743					1991-04-09	43.3753	0	-0.407	5.55556			18.6	9				130	95
Steno Center	12060	44744					1992-03-03	44.2767	0	-0.88	11.8056	72	81.0191	8.9	9.1
Steno Center	12060	44770					1993-03-01	45.2712	0	-0.311	7.63889	73	79.3809	15.8	9.7				181	104
Steno Center	12060	44709					1994-01-10	46.1342	0	0.188	25.6944			12.9	9.3				175	110
Steno Center	12060	44771					1996-09-09	48.8	0	-0.508	18.0556			15.3	9.2				170	105
Steno Center	12060	44772					1998-05-19	50.4904	0	-0.69	5			12.8					172	92	Last known alive 2011
Steno Center	12057	44679	1950-01-08	1	1	1979-09-21	1990-03-21	40.2247	1	0.116	15	67	120.981	9.6	8.3
Steno Center	12057	44680					1991-03-21	41.2247	1	-0.117	17.3611			9.6	8.5				152	93
Steno Center	12057	44681					1997-05-07	47.3589	1	0.562	24.3056	107	50.595	12.5	8.2	7	1.23		166	90
Steno Center	12057	44682					1999-11-17	49.8904	1	0.493	136.806			6.3	9.2
Steno Center	12057	44683					2000-10-04	50.7726	1	0.806	145.833	116	45.446	11.9	8.8	7.2		.
Steno Center	12057	44684					2005-06-21	55.4877	1	0.923	221.528	158	31.2464		7.4	4	1.3	1	130	80	Last known alive 2011
Steno Center	12059	44688	1947-06-09	0	1	1982-02-26	1990-08-01	43.1753	1	-0.581	5
Steno Center	12059	44698					1991-08-01	44.1753	1	-0.582	5
Steno Center	12059	44740					1993-08-02	46.1808	1	-0.643	13.1944			15.2	13
Steno Center	12059	44741					1994-09-14	47.2986	1	0.353	13.8889	75	76.2619	15.1	13.4
Steno Center	12059	44703					1995-06-29	48.0877	1	0.509	5.55556	61	96.4716	8	11.1	5	1.72	1.4	135	70
Steno Center	12059	44704					1996-01-10	48.6219	1	0.395	14.5833			17.4	13
Steno Center	12059	44705					1997-09-02	50.2685	1	0.507	27.7778			16.3	10.4				155	82
Steno Center	12059	49591					1999-02-25	51.7507	1	0.338	207.639	69	82.4453	15.2	11.8	5.7	2	1.4	176	92
Steno Center	12059	44707					2000-02-23	52.7452	1	0.402	496.528	72	78.1912	14.7	12.8						Died 2009
Steno Center	12061	44710	1959-08-31	1	1	1983-06-06	1990-12-13	31.3068	1	-0.487	18.75			5.7	9.2
Steno Center	12061	44746					1993-06-09	33.7973	1	-0.609	14			4.5	9.5
Steno Center	12061	44809					1995-06-16	35.8164	1	-0.108	11.1111			3.8	9				132	80
Steno Center	12061	44775					1996-09-17	37.074	1	-0.179	15			7.9	8.8				142	80
Steno Center	12061	44810					1998-10-01	39.1123	1	0.493	29.1667			11.4	8.4				123	79
Steno Center	12061	44747					1999-06-03	39.7836	1	0.331	41.6667	92	62.3982	3.9	7.9		1.47		129	80
Steno Center	12061	44783					2002-03-25	42.5945	1	0.609	204	91	62.3204		9.3	5.4	1.3	1	132	90	Last known alive 2011
Steno Center	12063	44774	1936-11-27	1	1	1983-10-07	1998-03-13	61.3315	1	0.089	5			2.4	7.4	6	1.31	4.1	170	95
Steno Center	12063	49585					1999-08-20	62.7699	1	0.046	4.86111			4.6	9.1	5.9	1		170	100
Steno Center	12063	44776					2000-04-07	63.4027	1	0.491	4.86111			3.8	9.2				140	85
Steno Center	12063	44806					2002-10-27	65.9589	1	0.311	24.3056				8.8	5.3	1.36		145	85
Steno Center	12063	44749					2003-11-12	67.0027	1	0.471	72.2222
Steno Center	12063	44807					2004-03-15	67.3425	1	0.397	85	48	118.803		8.8	5	1.1	2	129	86
Steno Center	12063	---					2006-01-08	69.1616	1	---	253.472										Last known alive 2009
Steno Center	12064	45464	1932-06-07	0	1	1984-05-10	1990-11-14	58.4767	1	0.377	4.86111			6.4	10.8
Steno Center	12064	44750					1991-05-14	58.9726	1	0.527	10.4167	62	90.8366	11.7	13				140	75
Steno Center	12064	44803					1992-11-11	60.4712	1	0.086	38.8889	96	54.5667	8.4	10.2				160	85
Steno Center	12064	44812					1993-11-08	61.463	1	-0.037	253.472
Steno Center	12064	49592					1994-05-09	61.9616	1	0.662	378.472	94	55.633	9.4	10.1				145	85	Last know alive 2008
Austin Health	1990	10534	1931-01-01	0	1	1969	1990-07-01	59.537	1	-0.573	10	56	101.961	10.8	8.6	5.2	1.66	6	146	73
Austin Health	1990	10549					1991-07-01	60.537	1	0.648	12.5	54	105.972	12.1	9	4.4	1.21	0.9	140	80
Austin Health	1990	10547					1992-06-01	61.4575	1	-0.898	20.7	63	88.4307	22.9	11.2	5.4	1.37	1.1	160	90
Austin Health	1990	10529					1993-01-01	62.0438	1	-0.082	15.7	59	95.201	11.4	10.4	5.5	1.56	1.1	150	65
Austin Health	1990	10540					1993-08-01	62.6247	1	-0.735	44.4	71	76.7417	8.4	8.4	5.3	1.5	0.6	130	75
Austin Health	1990	10531					1994-01-01	63.0438	1	-0.494	37.5	55	102.9	9.5	9	5.2	1.46	1	140	80
Austin Health	1990	10539					1994-10-01	63.7918	1	0.056	43.1	72	75.2305	6.5	10.1	5.3	1.44	0.8	160	70
Austin Health	1990	10538					1995-05-01	64.3726	1	-0.119	40.8	63	87.6027	9.4	9.2	4.8	1.24	0.9	130	80
Austin Health	1990	10530					1995-11-01	64.8767	1	0.171	61	60	92.5299	8	8.4	5.8	1.68	0.6	150	80
Austin Health	1990	10533					1996-04-01	65.2932	1	0.278	127.7			7	9.4	5.6	1.48	1.2	150	80
Austin Health	1990	10536					1998-02-01	67.1315	1	0.218	213.8			6.8	9.1	5.5	2.12	1	170	80
Austin Health	1990	10535					1999-04-01	68.2932	1	-0.46	207.5			5.8	12.3	6	1.74	1	175	90
Austin Health	1990	10542					1999-07-01	68.5425	1	0.414	288.9			12.3	8.7	4.2	1.66	0.7	180	80
Austin Health	1990	10532					2000-06-01	69.463	1	0.24	634.3			9.8	10.1	4.9	1.63	1.2	200	90	Died 20/05/2007
Austin Health	2004	10886	1944-01-01	1	1	1983	1988-11-01	44.8658	0	-0.724	2.65	77	100.779	5.9	6.4	5.1	1.07	0.7
Austin Health	2004	10894					1989-11-01	45.8658	0	-0.744	4.66
Austin Health	2004	10893					1990-09-01	46.6986	0	-0.92	10.34
Austin Health	2004	10892					1991-10-01	47.7808	0	-0.956	12.75
Austin Health	2004	10891					1992-09-01	48.7014	0	-0.149	9.74			4.8	8.4
Austin Health	2004	10890					1993-11-01	49.8685	0	-0.299	10.78	88	62.7381	7.5	6.9	6.1	1.33	0.9
Austin Health	2004	10889					1994-11-01	50.8685	0	-0.754	5.1	91	60.1146	5.4	7.9	5.3	1.04	1
Austin Health	2004	10901					1995-11-01	51.8685	0	-0.244	11.03	71	79.7343	6.5	7.8	5.4	1	1.1
Austin Health	2004	10900					1996-12-01	52.9534	0	-0.458	9.11	85	64.5094	5.9	7.6	5.3	0.86	1.8
Austin Health	2004	10888					1997-12-01	53.9534	0	-0.473	5.5	88	61.7433	14.7	7.7	5.9	1.11	1.7
Austin Health	2004	10898					1998-08-01	54.6192	0	-0.557	17.1	90	60.0131	8.8	7.4	5.5	0.9	1.5
Austin Health	2004	10897					1999-11-01	55.8712	0	-1.166	4.6			5.4	6.6	5.4	1.1	0.9	140	80
Austin Health	2004	10896					2000-10-01	56.789	0	-0.6	11.9			10	8	5.3	1.21	1	145	70	Last known alive 06/09/2010
Austin Health	3785	16563	1936-06-26	1	2	1978	1985-11-30	49.463	0	-0.928	5.8	88.9977	83.5981
Austin Health	3785	37483					1986-10-31	50.3808	0	-0.153	11.5
Austin Health	3785	16545					1987-10-31	51.3808	0	0.097	12.9
Austin Health	3785	16546					1988-10-31	52.3836	0	0.063	6.9
Austin Health	3785	16564					1989-10-31	53.3836	0	0.144	10.9
Austin Health	3785	16565					1990-11-30	54.4658	0	-1.233	5.6	89.9977	60.0491
Austin Health	3785	16566					1991-09-30	55.2986	0	-0.61	8.7
Austin Health	3785	16567					1992-07-31	56.1342	0	-0.634	7.7	82.9979	65.5279
Austin Health	3785	37486					1994-09-30	58.3014	0	-0.27	14.5	87.9977	60.7813			7.8			137	80
Austin Health	3785	16568					1995-11-30	59.4685	0	0.394	16.4	85.9978	62.1647
Austin Health	3785	16742					1996-10-31	60.389	0	0.267	12.6	75.9981	71.473	12.5	9.5	5.6	1.32	2.8			Last known alive 06/05/2002
Austin Health	3786	16570	1926-06-07	0	2	1973	1985-07-31	59.189	0	0.117	19.9	101.997	51.103
Austin Health	3786	37496					1986-07-31	60.189	0	0.239	8.1	95.9975	54.6201
Austin Health	3786	54988					1987-07-31	61.189	0	0.551	6.5	113.997	44.645
Austin Health	3786	19460					1988-07-31	62.1918	0	0.026	2.5	114.997	44.0517
Austin Health	3786	47167					1989-05-31	63.0247	0	0.077	5
Austin Health	3786	37531					1992-08-31	66.2795	0	-0.063	7.2	114.997	43.4861								Died, last known alive 12/02/1998
Austin Health	3787	16746	1922-05-03	0	2	1981	1985-08-31	63.3726	0	-0.032	2.2	66.9983	81.8576
Austin Health	3787	19791					1986-03-31	63.9534	0	0.162	7			16	8.2				140	90
Austin Health	3787	19560					1987-06-30	65.2027	0	-0.216	7.6	61.9984	89.0061	11.2	7.4	5.8	1.43	2	160	100
Austin Health	3787	19561					1988-07-31	66.2904	0	-0.097	9.2	69.9982	77.1148	17.4	10				160	90
Austin Health	3787	19562					1989-06-30	67.2055	0	0.123	12.9	66.9983	80.8876	13.1	8.9				125	70
Austin Health	3787	16547					1990-06-30	68.2055	0	-0.17	8.5	75.9981	69.7287	13.8	9.8	5.4	1.43	1.7	175	85
Austin Health	3787	16648					1991-06-30	69.2055	0	-0.121	7.3	73.9981	71.6958	13.5	10.1	5.4	1.46	2.4	145	95
Austin Health	3787	16548					1992-08-31	70.3781	0	-0.013	5.4	61.9984	87.6367	14.7	10	5.4	1.45	1.9	150	90
Austin Health	3787	16549					1993-07-31	71.2932	0	-0.906	12.5	81.9979	63.3032	13.5	10.3	5.7	1.46	1.9	180	100
Austin Health	3787	16693					1994-05-31	72.126	0	0.185	5.5			13	10.9	5.7	1.48	1.9	160	90
Austin Health	3787	16694					1995-07-31	73.2932	0	0.293	22.8	76.998	67.6889	12.6	10.5	6.2	1.42	2.9	160	90
Austin Health	3787	16650					1996-05-31	74.1288	0	-0.005	8.9	71.9982	72.9737	16.2	10.9	5.7	1.64	2	140	80
Austin Health	3787	16638					1997-01-31	74.8	0	0.197	4.6	55.9986	97.3474	4.7	8.3	6.1	1.64	1.7	150	80	Last known alive 06/10/2010
Austin Health	3788	16651	1952-02-21	0	2	1981	1988-05-31	36.2986	0	-0.356	6.2	63.9984	96.6376	17.5	7.8				140	95
Austin Health	3788	16640					1989-06-30	37.3808	0	-0.287	4.8	68.9982	88.0757	10.4	7.7				150	100
Austin Health	3788	16641					1990-05-31	38.2986	0	-0.48	6.3	51.9987	121.473	6.8	6.2				150	80
Austin Health	3788	16653					1991-04-30	39.2137	0	-0.332	11.4	71.9982	83.0436	5.4		8.2		2.6	160	100
Austin Health	3788	16698					1992-03-31	40.1342	0	0.019	7.9	62.9984	96.4235	13.6	8.4	5.6	1.78	2.4	140	95
Austin Health	3788	16699					1993-05-31	41.3014	0	0.023	8.6	85.9978	66.9397	11.7	8.4	4.3	1.7	1.8	130	80	Died 20/07/2000
Austin Health	3789	16720	1918-02-09	0	2	1964	1985-10-31	67.7699	0	0.109	10.5	55.9986	99.3176	13.8		8.2		1	130	70
Austin Health	3789	16721					1986-09-30	68.6849	0	-0.03	38.5	54.9986	101.129	9.3	9.5	7.4	1	2.2	150	70
Austin Health	3789	16722					1987-10-31	69.7699	0	0.31	13.5	57.9985	94.8146	8.1	10.1	8.7	1.02	1.7	140	70
Austin Health	3789	16723					1988-11-30	70.8548	0	0.076	12	57.9985	94.518	9.8	9.9	5.3	1.24	1.6	120	70
Austin Health	3789	16724					1989-07-31	71.5205	0	-0.054	18.5	73.9981	71.2185	13.9	10.5	5.1	1.1	0.9	140	80
Austin Health	3789	16725					1990-08-31	72.6055	0	0.121	14.2	73.9981	71.0012	8.4	10	4.7	1.14	1.4	150	70
Austin Health	3789	16726					1991-07-31	73.5205	0	-0.422	17.8	61.9984	86.863	11.3	8.7	5.7	1.28	1.1	140	85
Austin Health	3789	16727					1992-04-30	74.2712	0	-0.34	13.6	68.9982	76.6174	10	8.8	5.4	1.09	1.6	155	80
Austin Health	3789	16728					1993-04-30	75.2712	0	-0.459	13.7	71.9982	72.7475	6.6	8.9	5.6	1	1.3	140	80
Austin Health	3789	16747					1993-12-31	75.9425	0	0.122	10.1	69.9982	75.016	10.4	9.9	5.6	1.03	1.7	150	75	Died 09/06/2009
Austin Health	3791	16749	1918-07-08	0	2	1985	1985-07-31	67.1096	0	-0.488	5.7	74.9981	71.0359	19.9		4.7		0.6	130	80
Austin Health	3791	44142					1987-06-30	69.0247	0	-0.248	7.1	74.9981	70.6313	7.9	9	5.9	1.61	0.7	150	70
Austin Health	3791	44143					1988-07-31	70.1123	0	-0.748	4.6	74.9981	70.4075	13.7	10.5	5.5	1.57	0.8	130	80
Austin Health	3791	44144					1989-07-31	71.1123	0	-0.105	5	83.9979	61.5988	19.3	10.9	6.2	1.99	0.8	130	80
Austin Health	3791	19747					1992-07-31	74.1151	0	0.275	5.6	78.998	65.5666	16.2	8.7	5.3	1.35	0.9	160	95
Austin Health	3791	19755					1993-07-31	75.1151	0	-0.068	5.7	76.998	67.3523	15.1	8.8	6.5	1.67	1.1	150	90
Austin Health	3791	19631					1994-05-31	75.9479	0	-0.242	6.6	79.998	64.3021	12.8	9.6	5.8	1.48	1.3	130	70
Austin Health	3791	19751					1995-07-31	77.1151	0	-0.391	6.8	79.998	64.1033	13.7	8.5	5.5	1.68	1	170	95
Austin Health	3791	19713					1996-08-31	78.2027	0	-0.016	7	67.9983	77.1074	17.4	8.4	6.2	1.68	1	180	110
Austin Health	3791	19632					1996-12-31	78.537	0	0.222	7.7	67.9983	77.0407	8.8	7.8	5.9	1.46	1	172	97	Last known alive 27/01/2011
Austin Health	3792	19633	1923-06-28	0	2	1983	1984-08-31	61.2192	0	-0.417	7.3	91.9976	57.1724	14.8		5.4		0.6	145	90
Austin Health	3792	19634					1985-06-30	62.0493	0	-0.103	7.3	78.998	67.9749	18.1		6		0.6	130	90
Austin Health	3792	19753					1986-06-30	63.0493	0	-0.745	8.1	79.998	66.7782	17.4	9.6				140	85
Austin Health	3792	19635					1987-06-30	64.0493	0	-0.531	6	75.9981	70.6243	17.9	9.2	5.7	2.48	0.7	135	80
Austin Health	3792	19616					1988-04-30	64.8849	0	-0.163	3.9	79.998	66.3903	19.8	8.5	6.3	2.47	0.7	140	80
Austin Health	3792	19615					1989-06-30	66.0521	0	-0.435	9.6	94.9976	54.2507	16.6	7.7	4.7	2.29	0.5	140	70
Austin Health	3792	19885					1990-05-31	66.9699	0	-0.633	8	93.9976	54.7637	12.2	7.9	4.6	1.83	0.8	130	70
Austin Health	3792	19793					1991-06-30	68.0521	0	-0.479	7.4	82.9979	63.0163	18.6	8.5	4.4	1.88	0.5	130	75
Austin Health	3792	19886					1993-05-31	69.9726	0	-0.687	6.1	89.9977	57.0715	11.9	8.1	5.8	2.09	1	140	90
Austin Health	3792	19794					1994-04-30	70.8877	0	-0.316	8.7	87.9977	58.4167	9.1	9	6.5	2.6	0.5	120	70
Austin Health	3792	19887					1995-04-30	71.8877	0	-0.607	9.8	86.9978	59.0241	8.2	8.5	5.5	2	0.9	132	58
Austin Health	3792	19795					1996-06-30	73.0575	0	-0.388	10.6	73.9981	70.9117	9.5	9.7	5.8	2.16	0.8	150	90
Austin Health	3792	19796					1997-01-31	73.6466	0	-0.792	9.1	64.9983	82.2246	8.5	9.4	5.6	2.14	0.7	160	90	Last known alive 08/11/2010
Austin Health	3794	19552	1930-03-12	0	2	1984	1984-05-31	54.2575	0	-0.086	5.1	69.9982	80.3151	12	10	6.2		6.5	110	80
Austin Health	3794	19553					1985-03-31	55.0904	0	-1.098	3.75	85.9978	63.1373	8	9.2	6.6		0.7	130	90
Austin Health	3794	19618					1986-06-30	56.3397	0	-1.287	1.2	81.9979	66.4017	9	8.7	6		0.5	120	80
Austin Health	3794	19569					1987-05-31	57.2575	0	-0.946	5.5	68.9982	80.7725	9	7.5	6.8	1.5	0.6	120	80
Austin Health	3794	19563					1988-06-30	58.3425	0	-0.219	8.5	67.9983	81.8324	9.9	7.3	6.4	1.61	0.9	142	100
Austin Health	3794	19564					1989-04-30	59.1753	0	-1.072	8.6	67.9983	81.5973	8	8.6	6.3	1.61	0.7	138	96
Austin Health	3794	19566					1990-04-30	60.1753	0	-0.527	10	62.9984	88.8126	12.2	8.6	6.1	1.43	0.8	128	90
Austin Health	3794	19567					1991-04-30	61.1753	0	-0.263	13.8	79.998	67.1885	9.7	9.4	5.5	1.36	0.9	140	90
Austin Health	3794	19750					1992-09-30	62.5973	0	-0.497	12	72.9981	74.3293	14.8	10	5.9	1.47	0.8	120	80
Austin Health	3794	19596					1993-05-31	63.263	0	-1.19	9.8	83.9979	63.0789	11	10.1	6.4	1.38	0.9	120	95
Austin Health	3794	19597					1994-01-31	63.9342	0	-0.874	8.3	79.998	66.5895	9	9.8	6.2	1.45	0.9	125	80
Austin Health	3794	19570					1996-03-31	66.0986	0	0.034	9.4	82.9979	63.3899	12.3	9.1	5.6	1.36	0.7	150	90
Austin Health	3794	19571					1996-12-31	66.8521	0	-0.512	14.5	64.9983	83.8562	10	10.1	5.2	1.3	0.5	130	80	Last known alive 20/04/2005
Austin Health	3795	19572	1938-09-24	0	2	1981	1984-10-31	46.1342	0	-0.252	5.8	76.998	74.3581
Austin Health	3795	19573					1985-10-31	47.1342	0	-0.987	5.7
Austin Health	3795	19657					1986-10-31	48.1342	0	-0.742	12.8
Austin Health	3795	19575					1987-10-31	49.1342	0	-1.247	5.6
Austin Health	3795	19690					1988-10-31	50.137	0	-0.601	7.1
Austin Health	3795	19688					1989-10-31	51.137	0	-0.946	7.6
Austin Health	3795	19694					1990-10-31	52.137	0	-1.144	7.1
Austin Health	3795	19622					1991-10-31	53.137	0	-1.065	8.8
Austin Health	3795	19623					1992-10-31	54.1397	0	-0.621	7.4
Austin Health	3795	19624					1993-10-31	55.1397	0	-0.762	9.4	78.998	69.6236
Austin Health	3795	19625					1994-08-31	55.9726	0	-0.903	12.3	85.9978	62.934
Austin Health	3795	19693					1995-07-31	56.8877	0	-0.638	24.1	82.9979	65.3508
Austin Health	3795	19658					1996-07-31	57.8904	0	-0.782	9	75.9981	72.0888								Last known alive 20/09/2010
Austin Health	3809	41284	1930-01-01	0	2		1990-09-23	60.7671	1	0.356	8.1	175.995	27.085	8.1	9.1	5.1	1.26	1.4	140	75
Austin Health	3809	41293					1991-09-15	61.7452	1	0.435	11.5	184.995	25.4875	9.6	7.4	5.6	1.33	1.9	130	80
Austin Health	3809	41295					1992-02-23	62.1863	1	0.288	11.4	188.995	24.8301	8.7	7.4	6.2	1.23	2	120	80
Austin Health	3809	41439					1994-09-05	64.7205	1	0.72	260.8	171.996	27.4596	6	6.6	5.8	1.34	2.3	120	80
Austin Health	3809	41440					1995-09-19	65.7589	1	0.355	47.9	161.996	29.3299	9	7.5	5.2	1.18	2.4	110	75
Austin Health	3809	41442					1996-10-15	66.8329	1	0.802	205.2	170.996	27.4653	6	7.2	5.8	1.22	1.8	130	90
Austin Health	3809	41452					1997-07-21	67.5973	1	0.644	448.9	199.995	22.8703	9.7	6.6	5.5	1.28	2.2	170	80
Austin Health	3809	41459					1998-06-30	68.5397	1	0.654	159.1	228.994	19.5069	6	6.8	5.3	1.39	1.3	160	80	Died 04/10/2002
Austin Health	3812	41446	1927-01-01	0	2		1989-03-06	62.2192	1	0.239	7.3	68.9982	79.4213	10	6.8	5.5	0.87	2.7	150	80
Austin Health	3812	41447					1990-05-25	63.4384	1	0.134	10.2			7.9	6.5	5.5	0.85	2.3	130	70
Austin Health	3812	41448					1991-06-24	64.5205	1	0.327	16.8	73.9981	72.7233	9.7	7.1	5.6	0.77	3.6	160	70
Austin Health	3812	41449					1991-11-05	64.8877	1	-0.089	9.59	77.998	68.358	10.9	6.9	5.2	0.8	3.5	112	60
Austin Health	3812	41450					1992-04-08	65.3123	1	0.209	15.5	88.9977	58.6267	18.1	7.8	5.5	0.75	4.1	170	80
Austin Health	3812	41625					1993-08-24	66.6904	1	0.297	14.3			13	6.6	6.3	1.09	1.8	130	80
Austin Health	3812	41614					1994-02-15	67.1699	1	0.493	55.3			12.7	6.8	6.6	1.09	3.2	160	80
Austin Health	3812	54989					1994-08-23	67.6877	1	0.527	35.6			11.9	8.7	6.6	0.88	3.2	145	80
Austin Health	3812	41603					1995-02-21	68.1863	1	0.503	11.6			6.8	6.2	7	0.7	3.1	140	85
Austin Health	3812	41634					1997-03-13	70.2438	1	0.637	114.5	111.997	44.3074	11.9	10	8.7	0.64	13.6	140	70
Austin Health	3812	41606					1998-03-10	71.2356	1	0.674	208.7	109.997	45.1098	8.3	7.6	5.7	1.12	4.2	150	75	Last known alive 27/05/2002
Austin Health	3816	41644	1946-01-01	1	2		1988-11-16	42.9041	1	0.068	12.4	79.998	97.3125	7.9	8.1				132	92
Austin Health	3816	41645					1989-05-07	43.3753	1	0.058	3.4	91.9976	61.3146	9.1	7.8	3.8	0.95	1.4	120	80
Austin Health	3816	41629					1990-04-08	44.2959	1	0.427	5.3	82.9979	68.7555	10.9	7.6	4.2	1.04	2.1	130	95
Austin Health	3816	41630					1990-10-07	44.7945	1	0.512	3.9	94.9976	58.7008	8.9	7.4	3.3	1.07	1.4	140	100
Austin Health	3816	41631					1991-03-27	45.263	1	0.538	4.8	93.9976	59.2966	9.7	8.1	3.5	1.02	1.9	110	80
Austin Health	3816	41632					1991-06-16	45.4849	1	0.605	4.4	93.9976	59.2378	9.8	7.1	3.5	1.43	1.5	130	80
Austin Health	3816	41635					1992-04-05	46.2904	1	0.381	2.9	71.9982	80.2933	12.2	7.2	3.4	1.07	1.4	140	95
Austin Health	3816	41633					1992-09-13	46.7315	1	0.501	29.1	71.9982	80.1388	17.5	8.7	3.4	1.22	2	140	90
Austin Health	3816	41795					1993-01-24	47.0959	1	0.307	8.1	73.9981	77.5223	11.1	9.5	3.9	1.19	1.5	160	100
Austin Health	3816	41796					1993-11-08	47.8849	1	0.655	213.2	81.9979	68.63	12.4	8.6	5	1.5	1.5	150	100
Austin Health	3816	41799					1996-11-11	50.8959	1	0.659	568.3	135.997	37.8072	7.9	10.5	4.5	1.34	1.5	110	70	Died 27/12/2008
Austin Health	3817	40780	1944-01-01	1	2		1992-11-15	48.9068	1	0.142	13.7	70.9982	108.752	14	10.4	3.3	1.07	0.6	115	70
Austin Health	3817	40783					1993-01-17	49.0795	1	0.218	8	88.9977	62.1279	16	9.2	3.7	0.82	2.9	120	70
Austin Health	3817	40785					1993-05-10	49.389	1	0.312	11.6	67.9983	84.6473	16	9.2	3.5	1.01	0.9	130	70
Austin Health	3817	40782					1993-09-28	49.7753	1	0.395	10.7	86.9978	63.597	12.7	8.1	4.1	0.98	1.1	130	70
Austin Health	3817	40779					1994-01-24	50.0986	1	0.322	23.1	80.9979	68.973	5.5	8.6	3.7	0.86	1.3	130	70
Austin Health	3817	40777					1994-10-07	50.8	1	0.501	110.8	72.9981	77.548	8.5	7.7	3.6	0.8	1.9	140	80
Austin Health	3817	40784					1995-05-15	51.4027	1	0.446	108.5	88.9977	61.5473	21.1	8.6	4	0.98	1	125	80
Austin Health	3817	40776					1995-11-01	51.8685	1	0.599	296.9	73.9981	76.0181	19.3	10.1	4	0.9	1.3	160	80
Austin Health	3817	40778					1996-07-23	52.5945	1	0.58	631.5	78.998	70.2948	12.8	10.1	4	1.04	1	160	80	Last known alive 24/01/2002
Austin Health	3819	41484	1929-01-01	1	2		1988-08-04	59.6301	1	-0.102	9.7
Austin Health	3819	41485					1991-07-11	62.5644	1	0.048	18
Austin Health	3819	41486					1992-02-18	63.1726	1	-0.123	12.5
Austin Health	3819	41487					1993-07-26	64.6082	1	0.333	25.2
Austin Health	3819	41488					1993-11-19	64.926	1	0.399	21.7
Austin Health	3819	41505					1995-11-09	66.8986	1	0.264	33.5
Austin Health	3819	41492					1996-11-22	67.937	1	0.405	78.2
Austin Health	3819	41493					1999-06-08	70.4795	1	0.477	196
Austin Health	3819	41494					2000-06-16	71.5041	1	0.555	109.8
Austin Health	3826	41259	1926-01-01	0	2		1994-11-28	68.9534	1	0.198	5.5			9	8.1	5.9	1.12	2	160	85
Austin Health	3826	41260					1995-02-21	69.1863	1	-0.013	7.6	101.997	49.5093	7.4	7.3	6.1	1.28	2.3	116	66
Austin Health	3826	41261					1996-03-01	70.211	1	-0.385	6.2	101.997	49.3618	7.2	6.7	5.7	1.1	4.3	150	80
Austin Health	3826	41277					1996-07-02	70.5479	1	-0.12	15.6	93.9976	54.1881	8.6	6.5	5.6	1.19	3.9	140	85
Austin Health	3826	41278					1997-06-18	71.5096	1	0.615	62.1	92.9976	54.7105	6	6	5.3	2.1	2.1	160	80
Austin Health	3826	41279					1998-08-18	72.6767	1	0.309	33.1	91.9976	55.2155
Austin Health	3826	41280					1999-08-10	73.6548	1	0.554	42.3	87.9977	57.9643
Austin Health	3826	41291					2000-08-08	74.6521	1	0.513	209.2	86.9978	58.5737								Last known alive 05/02/2009
Austin Health	3906	41807	1921-01-01	0	2		1990-04-29	69.3699	1	-0.105	12.8	86	60.2496	10.1	9.2	7	1.26	2.9	148	63
Austin Health	3906	41808					1991-04-03	70.2986	1	0.261	8.99	110	45.2299	5.8	8.3	5.6	1.38	2	200	90
Austin Health	3906	42457					1992-06-21	71.5178	1	0.373	9.8	84	61.526	8.7	9.9	7.4	0.99	3	140	80
Austin Health	3906	42417					1992-10-06	71.811	1	0.141	12.9	88	58.2617	20.6	10.5	5.7	1.03	1.1	180	70
Austin Health	3906	42420					1993-06-15	72.5014	1	0.341	23.4	91	55.9421	6.8	8.2	6.7	1.12	1.6	180	90
Austin Health	3906	42422					1994-02-01	73.1342	1	0.302	37.9	99	50.6691	8.9	8	7	1.03	1.7	180	100
Austin Health	3906	42425					1994-04-29	73.3726	1	0.318	52.7	101	49.4803	7.9	8.5	6.5	0.94	2	150	80
Austin Health	3906	42421					1995-01-03	74.0548	1	0.572	71.1	111	44.2895	10.7	9.6	5.8	1.04	1.4	170	90
Austin Health	3906	42415					1995-10-10	74.8219	1	0.571	198	98	51.0293	10.9	9.6	6.2	0.96	1.3	160	80
Austin Health	3907	42470	1919-01-01	0	2		1993-11-30	74.9644	1	0.134	8.4	80.9979	63.5548	17	8.9	6.4	1.47	1.1	150	70
Austin Health	3907	42604					1994-11-15	75.9233	1	0.275	25.9	82.9979	61.6316	10.6	8.7	5.9	1.36	1	180	80
Austin Health	3907	42616					1995-05-02	76.3836	1	0.424	53.1	80.9979	63.3133	10.3	8.4	6.3	1.48	1.3	176	84
Austin Health	3907	42577					1996-07-17	77.5945	1	0.232	54	80.9979	63.1115	14.8	9.4	6.4	1.52	1.2	175	90
Austin Health	3907	41973					1998-05-05	79.3945	1	0.504	211	81.9979	61.9351	13.6	7.8	6.7	2.05	1	155	75	Died 25/5/2003
Austin Health	3908	41972	1925-01-01	1	2		1989-02-12	64.1589	1	0.536	5.1			13.2		5.3	0.91	3.2	150	85
Austin Health	3908	41971					1993-06-11	68.4877	1	0.24	11	73.9981	71.8477	11.3	9.3	4.8	0.76	3	155	85
Austin Health	3908	41970					1994-06-15	69.4986	1	0.347	14.9	91.9976	55.719	11.4	8.5	5.8	0.82	3.8	160	85
Austin Health	3908	41969					1995-01-31	70.1288	1	0.353	11	92.9976	54.9274	10.3	8.9	4.9	0.7	4.6	180	100
Austin Health	3908	41983					1995-10-03	70.8	1	0.381	12.3	78.998	66.1785	7.9	7.6	4.7	0.72	2.8	160	90
Austin Health	3908	41984					1996-04-09	71.3178	1	0.381	14.8	90.9977	56.131	9.8	8.6	5.4	0.6	7.9	180	90
Austin Health	3908	41986					1997-01-16	72.0904	1	0.389	32.3	83.9979	61.4283	10.9	9.4	4.3	0.66	2.7	150	90
Austin Health	3908	41988					1998-04-06	73.3096	1	0.509	111.7	89.9977	56.5343	9.9	8	5	0.95	3.2	170	80
Austin Health	3908	41990					1998-12-04	73.9726	1	0.595	203			14.2	9.8	6.1	1	3.9	180	85	Died 9/10/2000
Austin Health	3914	41532	1915-01-01	0	2		1988-11-27	73.9562	1	0.529	12.1	77	67.5633	14.1	8				137	90
Austin Health	3914	41533					1989-02-27	74.2082	1	0.016	17.2	68	77.9302	12.9	7.3	6.2	1.02	3	180	80
Austin Health	3914	41534					1989-06-04	74.474	1	0.322	12.4	79	65.5004	15.3	7.6	6.4	1.03	3	140	90
Austin Health	3914	41535					1990-04-29	75.3753	1	0.048	19.8	82	62.5899	14.3	7.6				120	80
Austin Health	3914	41543					1990-09-05	75.7288	1	0.383	24.8	74	70.3946	12.8	7.6	5.7	0.92	2.1	140	90
Austin Health	3914	41544					1991-06-13	76.4986	1	0.155	26.9	86	59.065	11.4	7.6	6.3	1.07	2.2	140	90
Austin Health	3914	41545					1991-12-04	76.9753	1	0.572	28.5			10.3	7	5.9	0.96	3.5	140	90
Austin Health	3914	41548					1993-05-03	78.389	1	0.427	47.7			17.1	8.3	6.8	0.99	3.3	150	80
Austin Health	3914	41557					1994-05-03	79.389	1	0.336	91	82	61.9342	8.9	7	6.1	0.96	2.3	180	100
Austin Health	3914	41558					1994-10-18	79.8493	1	0.402	177.5	80	63.6496	11.6	7.7	7.7	0.9	3.5	175	90
Austin Health	3914	41559					1995-09-19	80.7699	1	0.304	401.3	91	54.729	7.4	7.4	5.6	1.14	1.4	200	95
Austin Health	3914	41560					1996-01-02	81.0575	1	0.4	500	81	62.5527	11.9	7.2	6.3	1.14	2.4	170	90
Austin Health	3914	41569					1996-07-25	81.6192	1	0.64	552.4	87	57.5206	11.2	8.2	7.3	1.16	2.2	200	100	Last known alive 17/03/2006
